# Supplementary material for: A simple and effective strategy based on sodium gallate-exfoliated graphene for the simultaneous voltammetric determination of guaiacol and vanillin
Source: Royal Society of Chemistry journal article supplement (doi:10.1039/c9ay01018a), 2019-01-01
Supplement: c9ay01018a1.pdf [file c9ay01018a1.pdf]

## Supporting Information

### **A simple and effective strategy based on sodium gallate-exfoliated graphene for the simultaneous voltammetric determination of guaiacol and vanillin ‡**

Chenchen Li <sup>a</sup>, Ju Fu <sup>a</sup>, Xiaohong Tan <sup>a</sup>, Xinjian Song <sup>\*a,b</sup> and Qunfang Li <sup>a</sup>

<sup>a</sup> School of Chemical and Environmental Engineering, Hubei University for Nationalities, Enshi 445000, China

<sup>b</sup> Key Laboratory of Analytical Chemistry for Biology and Medicine (Ministry of Education), College of Chemistry and Molecular Sciences, Wuhan University, Wuhan 430072, China

\* To whom correspondence should be addressed.

Tel: +86 718 8437531; Fax: +86 718 8437531;

E-mail address: whxjsong@163.com

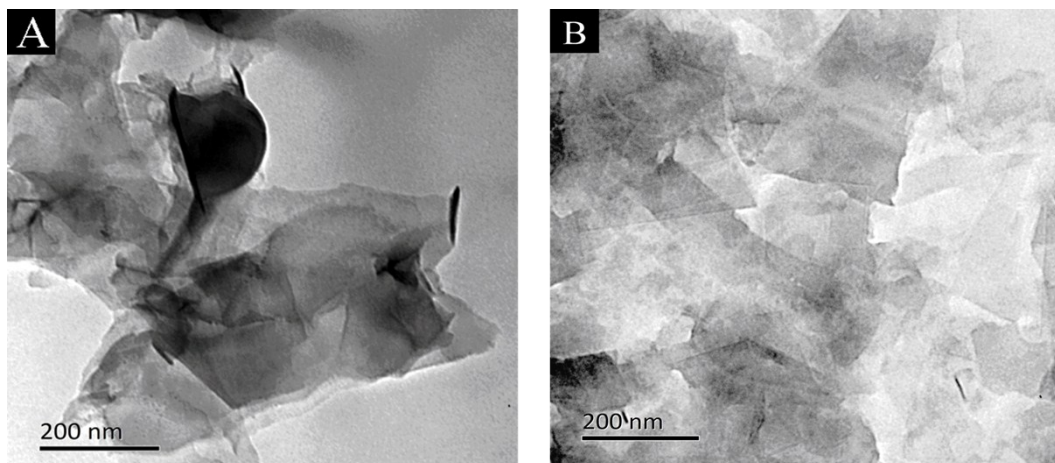

**Fig. S1.** TEM images of GNs (A) and SG-GNs (B).

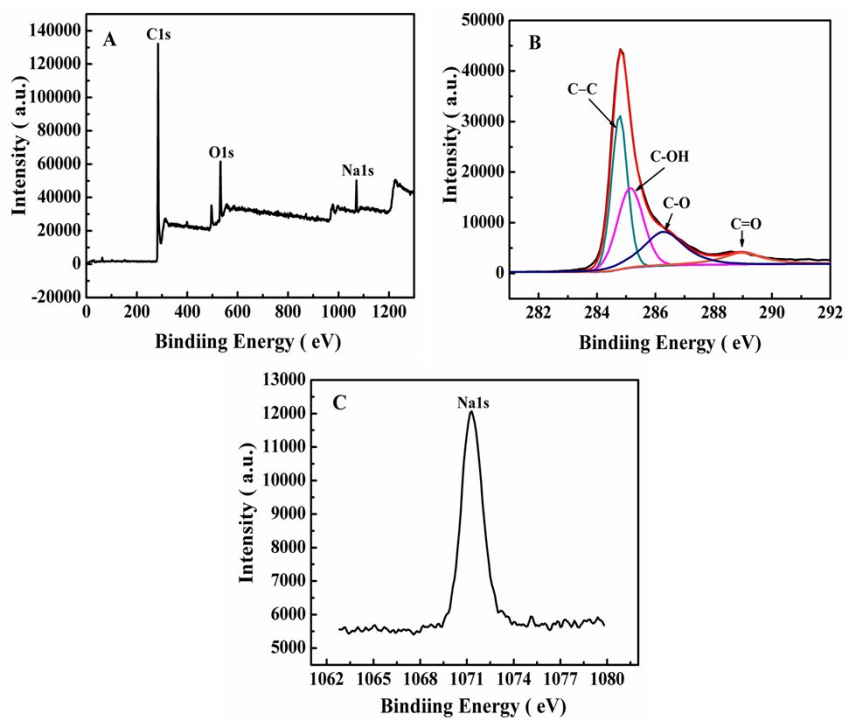

**Fig. S2.** XPS spectra of SG-GNs (A). High-resolution XPS spectra of C1s (B) and Na1s (C) of SG-GNs.

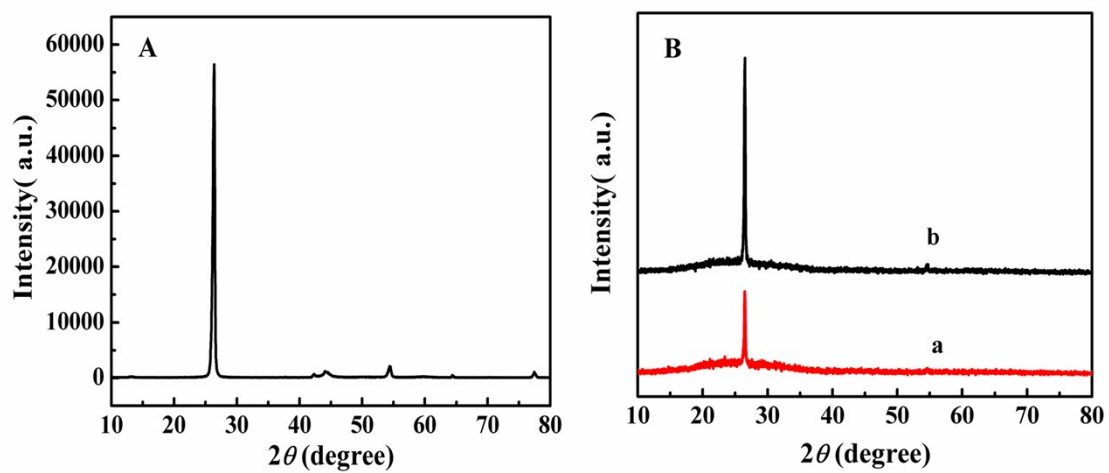

**Fig. S3.** Characterizations of (A) graphite powder and (B) SG-GNs(a), GNs(b) with XRD.

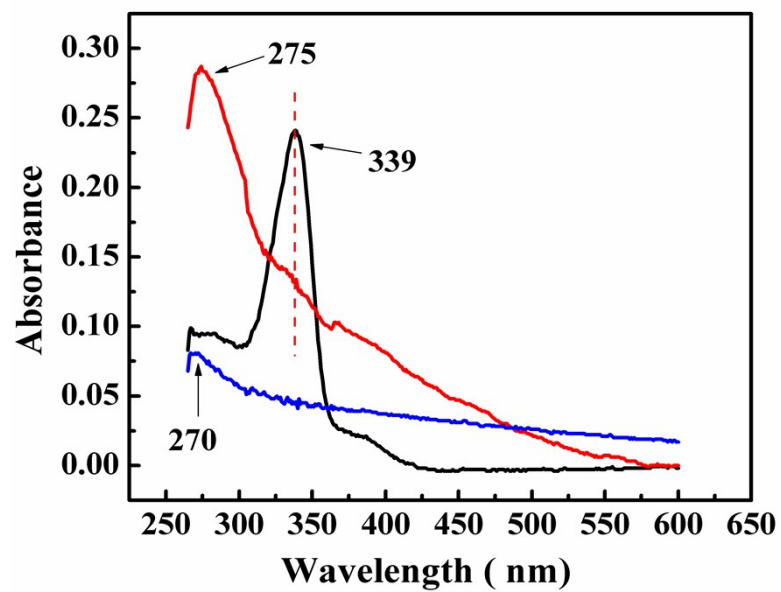

Fig. S4. UV of rGO (blue line), SG (black line), SG-GNs (red line)

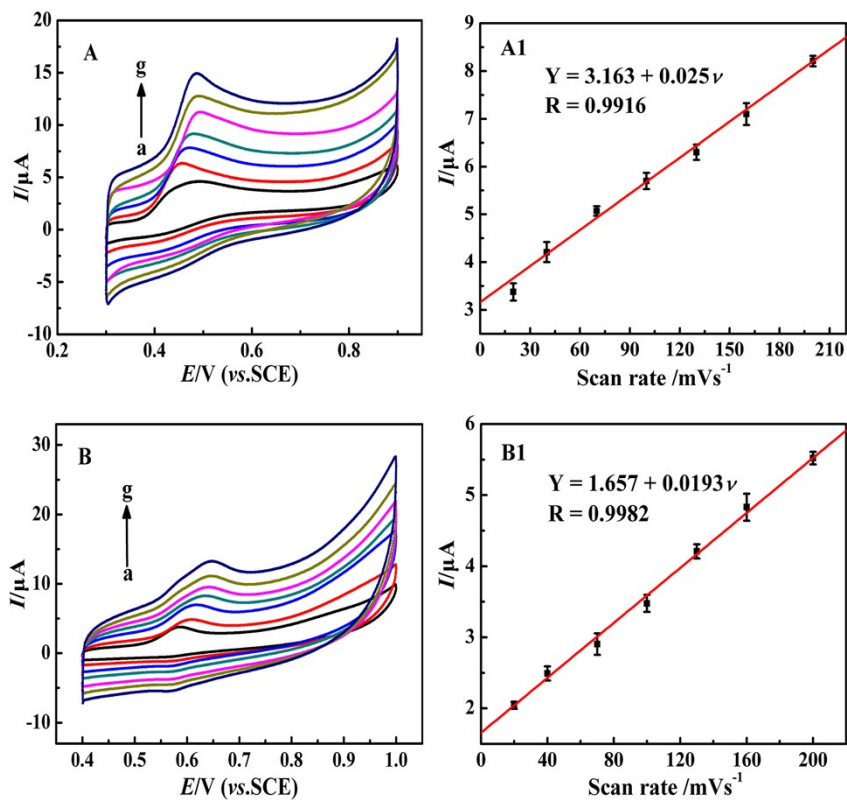

**Fig. S5.** CV curves of 40  $\mu\text{M}$  GUA (A) and VAN (B) on SG-GN/GCE with different scan rates of 20, 40, 70, 100, 130, 160, 200  $\text{mV}\cdot\text{s}^{-1}$  (a $\rightarrow$ g); plots of peak current versus scan rates ( $v$ : 20–200  $\text{mV}\cdot\text{s}^{-1}$ ) for GUA (A1) and VAN (B1).

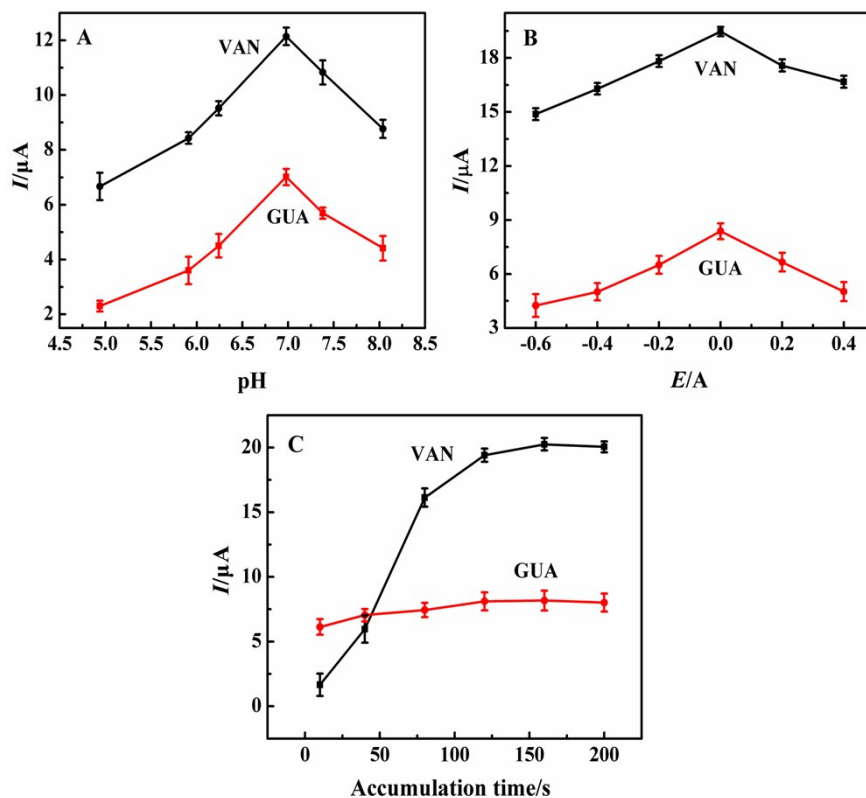

**Fig. S6.** Effects of pH value on the oxidation peak currents of 8  $\mu\text{M}$  VAN and 10  $\mu\text{M}$  GUA (A), accumulation potential on the oxidation peak currents of 8  $\mu\text{M}$  VAN and 10  $\mu\text{M}$  GUA (B), and accumulation time on the oxidation peak currents of 8  $\mu\text{M}$  VAN and 10  $\mu\text{M}$  GUA (C).

**Table S1** Comparisons of the proposed SG-GN/GCE with previous reported electrochemical methods for GUA and VAN determination.

| Modified electrode                       | Linear range |         | LOD     |        | References |
|------------------------------------------|--------------|---------|---------|--------|------------|
|                                          | (μM)         |         | (μM)    |        |            |
|                                          | GUA          | VAN     | GUA     | VAN    |            |
| Pt/γ-Al <sub>2</sub> O <sub>3</sub> /GCE | 0.05-30      |         | 0.0179  |        | [1]        |
| rGO/GCE                                  | 0.5-500      |         | 0.2     |        | [2]        |
| MWNTs-PDA@MIP/SWNT-COOH/GCE              |              |         | 0.2-10  |        | 0.1 [3]    |
| Ag-Pd/GO/GCE                             |              |         | 0.02-45 |        | 0.005 [4]  |
| CPB/CNF/GCE                              |              |         | 75-750  |        | 0.14 [5]   |
| AuNP-PAH/GCE                             |              |         | 0.9-15  |        | 0.055 [6]  |
| TBAC-900/GCE                             |              |         | 5-1150  |        | 0.68 [7]   |
| MFG/GCE                                  | 0.03-1       | 0.03-8  | 0.0013  | 0.001  | [8]        |
| SG-GN/GCE                                | 0.02-12      | 0.02-11 | 0.005   | 0.0045 | This work  |

## References

- 1 J. Y. Sun, T. Gan, Y. P. Deng, Z. X. Shi and Z. Lv, *Sens. Actuator B: Chem.*, 2015, **211**, 339–345.
- 2 Y. Wu, M. Huang, N. Song and W. Hu, *Anal. Methods*, 2014, **6**, 2729–2735.
- 3 W. Wu, L. Yang, F. Zhao and B. Zeng, *Sens. Actuator B: Chem.*, 2017, **239**, 481–487.
- 4 J. Li, H. Feng, J. Li, J. Jiang, Y. Feng, L. He and D. Qian, *Electrochim. Acta*, 2015, **176**, 827–835.
- 5 G. Ziyatdinova, E. Kozlova, E. Ziganshina and H. Budnikov, *Monatsh. Chem.*, 2016, **147**, 191–200.
- 6 T. R. Silva, D. Brondani, E. Zapp and I. C. Vieira, *Electroanal.*, 2015, **27**, 465–472.
- 7 V. Veeramani, R. Madhu, S.-M. Chen, P. Veerakumar, J. J. Syu and S. B. Liu, *New J. Chem.*, 2015, **39**, 9109–9115.
- 8 T. Gan, Z. Shi, Y. Deng, J. Sun and H. Wang, *Electrochim. Acta*, 2014, **147**, 157–166.
